# Supplementary material
Source: Springer Nature journal article supplement (https://www.springermedizin.de/resource/supplementary/12885_2010_2522_MOESM4_ESM.pdf/9461946)
Supplement: MOESM4 [file 9461946]

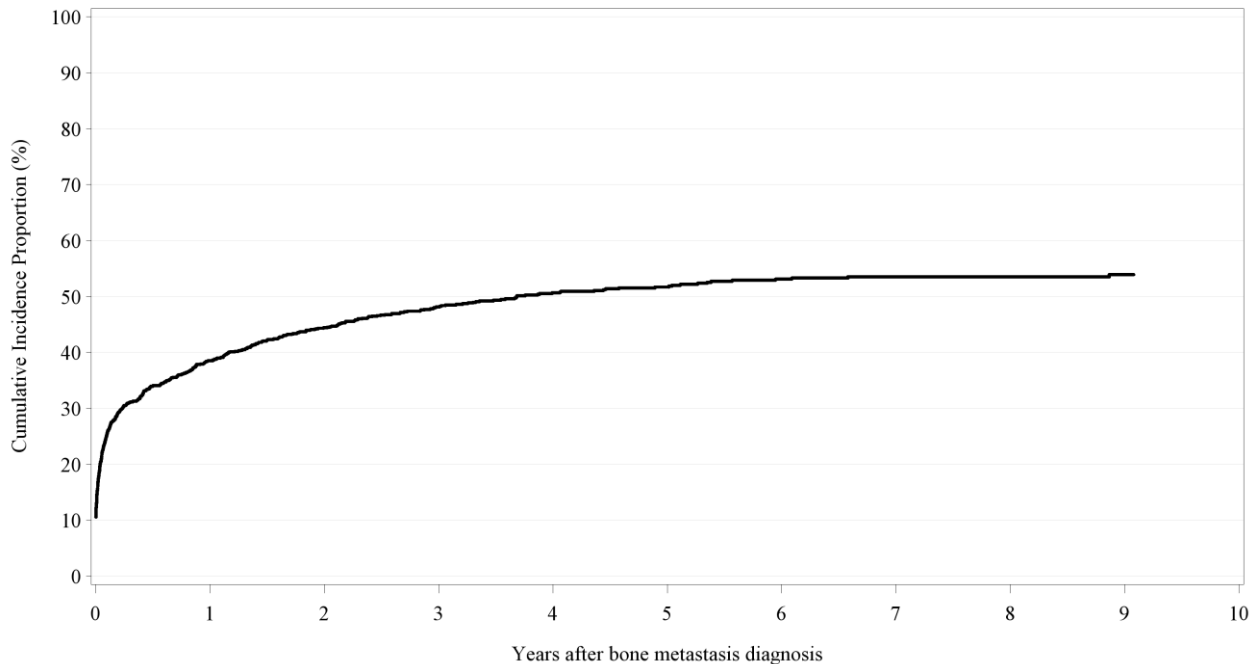

| <b>1- year incidence of SREs<br/>(95% CI)</b> | <b>3-year incidence of SREs<br/>(95% CI)</b> | <b>5-year incidence of SREs<br/>(95% CI)</b> |
|-----------------------------------------------|----------------------------------------------|----------------------------------------------|
| 38.5%<br>(36.0% - 41.0%)                      | 48.1%<br>(45.4% - 50.8%)                     | 51.7%<br>(48.9% - 54.4%)                     |
